# Supplementary material for: Heterologous Vector—mRNA Based SARS-CoV-2 Vaccination Strategy Appears Superior to a Homologous Vector—Based Vaccination Scheme in German Healthcare Workers Regarding Humoral SARS-CoV-2 Response Indicating a High Boosting Effect by mRNA Vaccines
Source: MDPI journal article supplement (doi:10.3390/vaccines11030701), 2023-03-19
Supplement: s1 [file s1]

Supplemental Table S1: Individual Breakthrough data.

| No. | Break-through | Days [pos qPCR - sampling] | Anti-N-ab t4 | Anti-N-ab t5 | Anti-S/RBD-ab t4 | Anti-S/RBD-ab t5 | Circulating variant    | Vaccination strategy |
|-----|---------------|----------------------------|--------------|--------------|------------------|------------------|------------------------|----------------------|
| 1   | pos           | t5=47                      | 0.085        | 0.207        | 9548             | 7361             | B1.1.529               | vec - vec - mRNA     |
| 2   | pos           | t prior to qPCR            | Na           | 0.045        | Na               | 1182             | B1.1.529               | vec - mRNA -mRNA     |
| 3   | pos           | t prior to qPCR            | 0.081        | 0.057        | 16857            | 6853             | B1.1.529               | vec - mRNA -mRNA     |
| 4   | pos           | t prior to qPCR            | Na           | 0.059        | Na               | 3326             | B1.1.529               | vec - mRNA -mRNA     |
| 5   | pos           | t prior to qPCR            | 0.09         | 0.06         | 9242             | 3203             | B1.1.529               | vec - mRNA -mRNA     |
| 6   | pos           | t prior to qPCR            | 0.079        | Na           | 10148            | Na               | B1.1.529               | vec - mRNA -mRNA     |
| 7   | neg           | Na                         | 0.07         | Na           | 11355            | Na               | B1.1.529               | vec - vec - mRNA     |
| 8   | pos           | t5=20                      | 0.076        | 28.8         | 16091            | 14277            | B1.1.529               | vec - mRNA -mRNA     |
| 9   | pos           | t prior to qPCR            | Na           | Na           | Na               | Na               | B1.1.529               | vec - mRNA -mRNA     |
| 10  | neg           | Na                         | Na           | Na           | Na               | Na               | B1.1.529               | vec - vec - mRNA     |
| 13  | neg           | Na                         | 0.085        | 0.055        | 8197             | 3397             | B1.1.529               | vec - mRNA -mRNA     |
| 14  | neg           | Na                         | 0.103        | 0.077        | 34049            | 7534             | B1.1.529               | vec - mRNA -mRNA     |
| 15  | pos           | t5=99                      | Na           | 49.74        | Na               | 14881            | B1.1.529               | vec - mRNA -mRNA     |
| 17  | pos           | t prior to qPCR            | Na           | Na           | Na               | Na               | B1.1.529               | vec - mRNA -mRNA     |
| 20  | neg           | Na                         | 0.063        | 0.059        | 31780            | 1355             | B1.1.529               | vec - vec - mRNA     |
| 22  | pos           | t prior to qPCR            | Na           | Na           | Na               | Na               | B1.1.529               | vec - vec - mRNA     |
| 23  | neg           | Na                         | 0.082        | 0.06         | 2736             | 658,9            | B1.1.529               | vec - vec - mRNA     |
| 25  | neg           | Na                         | 0.081        | 0.057        | 9695             | 3297             | B1.1.529               | vec - mRNA -mRNA     |
| 26  | neg           | Na                         | Na           | 0.057        | Na               | 4627             | B1.1.529               | vec - mRNA -mRNA     |
| 27  | pos           | t prior to qPCR            | Na           | Na           | Na               | Na               | B1.1.529               | Na                   |
| 28  | pos           | t prior to qPCR            | Na           | Na           | Na               | Na               | B1.1.529               | Na                   |
| 30  | pos           | Inapparent                 | Na           | 1.79         | Na               | 33184            | B1.1.529               | vec - mRNA -mRNA     |
| 31  | neg           | Na                         | Na           | Na           | Na               | Na               | B1.1.529               | vec - mRNA -mRNA     |
| 32  | neg           | Na                         | 0.084        | 0.057        | 11625            | 7698             | B1.1.529               | vec - mRNA -mRNA     |
| 34  | pos           | t prior to qPCR            | Na           | Na           | Na               | Na               | B1.1.529               | vec - vec - mRNA     |
| 36  | pos           | t5=78                      | 0.082        | 11.42        | 9824             | 67025            | B1.1.529               | vec - mRNA -mRNA     |
| 37  | neg           | Na                         | Na           | 0.053        | Na               | 4045             | B1.1.529               | vec - mRNA -mRNA     |
| 38  | pos           | t4= 18d; t5=82d            | 8.11         | 18.18        | 28632            | 18952            | B.1.617.2/<br>B1.1.529 | vec - mRNA -mRNA     |
| 39  | pos           | t5=105                     | 0.084        | 44.72        | 15520            | 10384            | B1.1.529               | vec - vec - mRNA     |
| 40  | neg           | Na                         | Na           | 0.06         | Na               | 119              | B1.1.529               | vec - vec - mRNA     |
| 42  | neg           | Na                         | 0.083        | 0.056        | 9936             | 4812             | B1.1.529               | vec - vec - mRNA     |
| 43  | neg           | Na                         | Na           | Na           | Na               | Na               | B1.1.529               | vec - mRNA -mRNA     |
| 44  | neg           | Na                         | 0.081        | 0.061        | 9382             | 4962             | B1.1.529               | vec - vec - mRNA     |
| 48  | neg           | Na                         | 0.058        | Na           | 13670            | Na               | B1.1.529               | vec - mRNA -mRNA     |
| 49  | pos           | t prior to qPCR            | 0.059        | 0.053        | 13142            | 6071             | B1.1.529               | vec - mRNA -mRNA     |
| 50  | pos           | t prior to qPCR            | Na           | Na           | Na               | Na               | B1.1.529               | Na                   |
| 51  | neg           | Na                         | 0.087        | 0.055        | 2835             | 956,1            | B1.1.529               | vec - mRNA -mRNA     |
| 52  | pos           | t prior to qPCR            | Na           | Na           | Na               | Na               | B1.1.529               | Na                   |
| 54  | pos           | t prior to qPCR            | 0.06         | 0.057        | 4956             | 2247             | B1.1.529               | vec - vec - mRNA     |
| 55  | pos           | Inapparent                 | 26.56        | 44.14        | 100000           | 48216            | B1.1.529               | vec - vec - mRNA     |
| 57  | pos           | t prior to qPCR            | 0.082        | Na           | 33901            | Na               | B1.1.529               | vec - mRNA -mRNA     |

|     |     |                 |       |       |       |       |          |                   |
|-----|-----|-----------------|-------|-------|-------|-------|----------|-------------------|
| 58  | pos | t prior to qPCR | Na    | Na    | Na    | Na    | B1.1.529 | vec - vec - mRNA  |
| 59  | neg | Na              | Na    | 0.057 | Na    | 3133  | B1.1.529 | vec - mRNA -mRNA  |
| 60  | pos | t5=43           | 0.079 | 17.43 | 12780 | 20177 | B1.1.529 | vec - mRNA -mRNA  |
| 61  | neg | Na              | Na    | 51.0  | Na    | 20828 | B1.1.529 | vec - mRNA -mRNA  |
| 62  | pos | t prior to qPCR | Na    | Na    | Na    | Na    | B1.1.529 | vec - mRNA -mRNA  |
| 63  | neg | Na              | 0.066 | 0.066 | 11228 | 5380  | B1.1.529 | vec - vec - mRNA  |
| 66  | neg | Na              | 0.081 | 0.054 | 19885 | 7528  | B1.1.529 | vec - mRNA -mRNA  |
| 67  | pos | t prior to qPCR | 0.09  | 0.07  | 11327 | 2187  | B1.1.529 | vec - mRNA -mRNA  |
| 69  | neg | Na              | 0.08  | 0.053 | 37654 | 11652 | B1.1.529 | vec - vec - mRNA  |
| 71  | pos | t prior to qPCR | Na    | Na    | Na    | Na    | B1.1.529 | vec - vec - mRNA  |
| 72  | neg | Na              | 0.085 | 0.06  | 9330  | 2295  | B1.1.529 | vec - mRNA -mRNA  |
| 73  | pos | t5=54           | Na    | 96.3  | Na    | 87242 | B1.1.529 | vec - mRNA -mRNA  |
| 75  | pos | t prior to qPCR | 0.085 | 0.054 | 15283 | 6837  | B1.1.529 | vec - mRNA -mRNA  |
| 76  | pos | t prior to qPCR | Na    | Na    | Na    | Na    | B1.1.529 | vec - mRNA -mRNA  |
| 77  | neg | Na              | Na    | 0.09  | Na    | 4687  | B1.1.529 | vec - vec - mRNA  |
| 78  | pos | t prior to qPCR | Na    | Na    | Na    | Na    | B1.1.529 | vec - mRNA -mRNA  |
| 79  | pos | t prior to qPCR | 0.055 | 0.054 | 19698 | 6537  | B1.1.529 | vec - mRNA -mRNA  |
| 81  | pos | t4=4d, t5 Na    | 1.97  | Na    | 8927  | Na    | B1.1.529 | vec - vec - mRNA  |
| 83  | pos | t5=9            | 0.079 | 0.645 | 7077  | 17170 | B1.1.529 | vec - vec - mRNA  |
| 84  | neg | Na              | Na    | Na    | Na    | Na    | B1.1.529 | vec - mRNA -mRNA  |
| 86  | pos | t prior to qPCR | Na    | Na    | Na    | Na    | B1.1.529 | vec - mRNA -mRNA  |
| 88  | neg | Na              | 0.08  | 0.05  | 7416  | 2046  | B1.1.529 | vec - mRNA -mRNA  |
| 89  | pos | t prior to qPCR | Na    | Na    | Na    | Na    | B1.1.529 | vec - vec - mRNA  |
| 90  | neg | Na              | 0.081 | Na    | 49880 | Na    | B1.1.529 | vec - mRNA -mRNA  |
| 91  | neg | Na              | 0.066 | 0.053 | 13445 | 6577  | B1.1.529 | vec - mRNA -mRNA  |
| 92  | neg | Na              | 0.062 | Na    | 7588  | Na    | B1.1.529 | vec - vec - mRNA  |
| 93  | pos | t5=43d          | 0.08  | 67.81 | 55724 | 42426 | B1.1.529 | vec - vec - mRNA  |
| 96  | pos | t prior to qPCR | 0.086 | 0.061 | 12924 | 3505  | B1.1.529 | vec - mRNA -mRNA  |
| 97  | neg | Na              | 0.084 | 0.052 | 17224 | 8875  | B1.1.529 | vec - vec - mRNA  |
| 98  | pos | t5=28           | 0.073 | 29.65 | 21093 | 40855 | B1.1.529 | mRNA - mRNA -mRNA |
| 99  | pos | t prior to qPCR | Na    | Na    | Na    | Na    | B1.1.529 | mRNA - mRNA -mRNA |
| 101 | pos | t5=24           | 0.079 | 2.15  | 9001  | 11069 | B1.1.529 | mRNA - mRNA -mRNA |
